# Supplementary material for: Association of alcohol consumption with the incidence of proteinuria and chronic kidney disease: a retrospective cohort study in Japan
Source: Nutr J. 2022 May 14;21:31. doi: 10.1186/s12937-022-00785-x (PMC9107250; doi:10.1186/s12937-022-00785-x)
Supplement: Supplementary file 1 — Additional file 1. Alcohol consumption and the incidence of proteinuria in males and females [table]. [file 12937_2022_785_MOESM1_ESM.docx]

**Additional file 1**.

**Alcohol consumption and the incidence of proteinuria in males and females**

|  | **Daily alcohol consumption categories (g of alcohol)** | | | |
| --- | --- | --- | --- | --- |
|  | **No** | **<23** | **23–46** | **≥46** |
| **Males** |  |  |  |  |
| Adjusted model | 1.0 (reference) | 0.95 (0.85–1.06) | 0.95 (0.84–1.08) | 1.09 (0.93–1.28) |
| **Females** |  |  |  |  |
| Adjusted model | 1.0 (reference) | 1.04 (0.84–1.27) | 0.92 (0.67–1.26) | 1.48 (1.04–2.11) * |

PY, person-years; CI, confidence interval.

Multivariable model by multiple imputation analysis for missing data: adjusted for age (years) and eGFR (mL/min/1.73 m2) at baseline, body mass index (BMI) (kg/m2), smoking status (never/former and current smokers), and current treatment for comorbidities (hypertension, dyslipidemia, diabetes mellitus, and cardiovascular disease).

**P* < .05.
